# Supplementary material
Source: Royal Society of Chemistry journal article supplement (doi:10.1039/d5ja00509d)
Supplement: d5ja00509d1.pdf [file d5ja00509d1.pdf]

SUPPLEMENTARY INFORMATION

Determination of absolute isotope ratios of vanadium by internal standardisation

D. Malinovsky, P.J.H. Dunn, B.A. Engin, H. Goenaga-Infante

Table S1. Isotope ratio data obtained in individual measurements of NIST SRM 3165 vanadium standard solution (Lot No. 992706) doped with iron standard IRMM-014 in this study, after correction for instrumental blank only. Each measurement consisted of 100 cycles, with each cycle being 8 seconds duration. Standard deviation represents 1- $\sigma$  level. Values of the RF power of MC-ICP-MS at which the measurements were performed are also shown (see text for details).

| Session 1     |                               |       |                                 |       |                                 |         |                                 |          |             |
|---------------|-------------------------------|-------|---------------------------------|-------|---------------------------------|---------|---------------------------------|----------|-------------|
|               | $^{51}\text{V}/^{50}\text{V}$ | stdev | $^{56}\text{Fe}/^{54}\text{Fe}$ | stdev | $^{57}\text{Fe}/^{54}\text{Fe}$ | stdev   | $^{57}\text{Fe}/^{56}\text{Fe}$ | stdev    | RF power, W |
| measurement 1 | 409.89                        | 0.32  | 16.500                          | 0.002 | 0.39027                         | 0.00008 | 0.023653                        | 0.000005 | 1150        |
| measurement 2 | 409.82                        | 0.29  | 16.502                          | 0.002 | 0.39032                         | 0.00007 | 0.023653                        | 0.000004 | 1170        |
| measurement 3 | 409.88                        | 0.39  | 16.501                          | 0.001 | 0.39031                         | 0.00007 | 0.023654                        | 0.000004 | 1190        |
| measurement 4 | 410.08                        | 0.33  | 16.498                          | 0.003 | 0.39035                         | 0.00007 | 0.023660                        | 0.000006 | 1220        |
| measurement 5 | 410.09                        | 0.31  | 16.507                          | 0.002 | 0.39057                         | 0.00007 | 0.023661                        | 0.000004 | 1240        |
| measurement 6 | 410.19                        | 0.45  | 16.509                          | 0.002 | 0.39073                         | 0.00007 | 0.023667                        | 0.000004 | 1270        |
| Session 2     |                               |       |                                 |       |                                 |         |                                 |          |             |
|               | $^{51}\text{V}/^{50}\text{V}$ | stdev | $^{56}\text{Fe}/^{54}\text{Fe}$ | stdev | $^{57}\text{Fe}/^{54}\text{Fe}$ | stdev   | $^{57}\text{Fe}/^{56}\text{Fe}$ | stdev    | RF power, W |
| measurement 1 | 410.33                        | 0.20  | 16.492                          | 0.005 | 0.39020                         | 0.00016 | 0.023660                        | 0.000004 | 1200        |
| measurement 2 | 410.26                        | 0.17  | 16.509                          | 0.002 | 0.39056                         | 0.00009 | 0.023658                        | 0.000004 | 1250        |
| measurement 3 | 410.27                        | 0.21  | 16.510                          | 0.002 | 0.39059                         | 0.00009 | 0.023657                        | 0.000004 | 1300        |
| measurement 4 | 410.13                        | 0.23  | 16.514                          | 0.002 | 0.39075                         | 0.00008 | 0.023662                        | 0.000004 | 1350        |
| Session 3     |                               |       |                                 |       |                                 |         |                                 |          |             |
|               | $^{51}\text{V}/^{50}\text{V}$ | stdev | $^{56}\text{Fe}/^{54}\text{Fe}$ | stdev | $^{57}\text{Fe}/^{54}\text{Fe}$ | stdev   | $^{57}\text{Fe}/^{56}\text{Fe}$ | stdev    | RF power, W |
| measurement 1 | 409.31                        | 0.42  | 16.494                          | 0.003 | 0.38999                         | 0.00013 | 0.023644                        | 0.000006 | 1080        |
| measurement 2 | 408.05                        | 0.67  | 16.497                          | 0.002 | 0.39009                         | 0.00014 | 0.023647                        | 0.000008 | 960         |
| measurement 3 | 409.11                        | 0.67  | 16.507                          | 0.002 | 0.39035                         | 0.00011 | 0.023648                        | 0.000007 | 980         |
| measurement 4 | 409.44                        | 0.66  | 16.528                          | 0.002 | 0.39108                         | 0.00008 | 0.023662                        | 0.000005 | 1000        |

|                |                               |       |                                 |       |                                 |         |                                 |          |             |
|----------------|-------------------------------|-------|---------------------------------|-------|---------------------------------|---------|---------------------------------|----------|-------------|
| measurement 5  | 409.55                        | 0.35  | 16.541                          | 0.002 | 0.39161                         | 0.00007 | 0.023674                        | 0.000004 | 1020        |
| measurement 6  | 409.72                        | 0.54  | 16.537                          | 0.002 | 0.39141                         | 0.00009 | 0.023669                        | 0.000005 | 1040        |
| measurement 7  | 409.70                        | 0.43  | 16.526                          | 0.002 | 0.39100                         | 0.00005 | 0.023659                        | 0.000005 | 1060        |
| measurement 8  | 408.72                        | 0.45  | 16.452                          | 0.002 | 0.38829                         | 0.00012 | 0.023601                        | 0.000007 | 1100        |
| measurement 9  | 408.15                        | 0.39  | 16.393                          | 0.003 | 0.38609                         | 0.00016 | 0.023551                        | 0.000008 | 1120        |
| measurement 10 | 407.58                        | 0.92  | 16.348                          | 0.006 | 0.38419                         | 0.00032 | 0.023501                        | 0.000014 | 1140        |
| measurement 11 | 406.55                        | 1.10  | 16.323                          | 0.004 | 0.38324                         | 0.00030 | 0.023478                        | 0.000015 | 1160        |
| measurement 12 | 406.55                        | 1.37  | 16.317                          | 0.005 | 0.38257                         | 0.00029 | 0.023446                        | 0.000014 | 1180        |
| measurement 13 | 409.36                        | 0.48  | 16.524                          | 0.002 | 0.39067                         | 0.00014 | 0.023643                        | 0.000008 | 1200        |
| measurement 14 | 409.44                        | 0.41  | 16.513                          | 0.003 | 0.39026                         | 0.00009 | 0.023633                        | 0.000006 | 1220        |
| measurement 15 | 408.98                        | 0.71  | 16.528                          | 0.002 | 0.39100                         | 0.00012 | 0.023656                        | 0.000007 | 1240        |
| measurement 16 | 409.32                        | 0.32  | 16.523                          | 0.002 | 0.39058                         | 0.00014 | 0.023639                        | 0.000007 | 1260        |
| measurement 17 | 409.27                        | 0.59  | 16.517                          | 0.002 | 0.39021                         | 0.00012 | 0.023625                        | 0.000008 | 1280        |
| measurement 18 | 408.94                        | 0.47  | 16.535                          | 0.003 | 0.39096                         | 0.00010 | 0.023645                        | 0.000008 | 1300        |
| measurement 19 | 409.05                        | 0.51  | 16.527                          | 0.002 | 0.39056                         | 0.00014 | 0.023632                        | 0.000008 | 1320        |
| Session 4      |                               |       |                                 |       |                                 |         |                                 |          |             |
|                | $^{51}\text{V}/^{50}\text{V}$ | stdev | $^{56}\text{Fe}/^{54}\text{Fe}$ | stdev | $^{57}\text{Fe}/^{54}\text{Fe}$ | stdev   | $^{57}\text{Fe}/^{56}\text{Fe}$ | stdev    | RF power, W |
| measurement 1  | 406.54                        | 1.46  | 16.474                          | 0.005 | 0.38929                         | 0.00016 | 0.023631                        | 0.000007 | 1100        |
| measurement 2  | 407.04                        | 1.44  | 16.479                          | 0.002 | 0.38964                         | 0.00010 | 0.023645                        | 0.000007 | 1140        |
| measurement 3  | 406.78                        | 1.64  | 16.474                          | 0.002 | 0.38952                         | 0.00014 | 0.023644                        | 0.000008 | 1080        |
| measurement 4  | 408.93                        | 0.63  | 16.492                          | 0.002 | 0.39000                         | 0.00009 | 0.023648                        | 0.000006 | 1060        |
| measurement 5  | 409.78                        | 0.39  | 16.525                          | 0.002 | 0.39118                         | 0.00010 | 0.023672                        | 0.000006 | 1040        |
| measurement 6  | 409.79                        | 0.45  | 16.506                          | 0.003 | 0.39041                         | 0.00015 | 0.023652                        | 0.000007 | 1020        |
| measurement 7  | 409.95                        | 0.43  | 16.529                          | 0.002 | 0.39123                         | 0.00012 | 0.023669                        | 0.000008 | 1000        |
| measurement 8  | 410.23                        | 0.46  | 16.526                          | 0.002 | 0.39111                         | 0.00012 | 0.023666                        | 0.000006 | 980         |
| measurement 9  | 410.10                        | 0.31  | 16.540                          | 0.002 | 0.39169                         | 0.00008 | 0.023681                        | 0.000005 | 960         |
| measurement 10 | 410.13                        | 0.48  | 16.538                          | 0.003 | 0.39155                         | 0.00011 | 0.023675                        | 0.000005 | 940         |
| measurement 11 | 410.32                        | 0.56  | 16.529                          | 0.002 | 0.39123                         | 0.00011 | 0.023669                        | 0.000006 | 920         |
| measurement 12 | 410.45                        | 0.38  | 16.550                          | 0.003 | 0.39195                         | 0.00010 | 0.023683                        | 0.000005 | 900         |
| measurement 13 | 410.28                        | 0.35  | 16.545                          | 0.002 | 0.39182                         | 0.00011 | 0.023682                        | 0.000008 | 880         |

|                |                               |       |                                 |       |                                 |         |                                 |          |             |
|----------------|-------------------------------|-------|---------------------------------|-------|---------------------------------|---------|---------------------------------|----------|-------------|
| measurement 14 | 410.50                        | 0.41  | 16.545                          | 0.003 | 0.39173                         | 0.00016 | 0.023677                        | 0.000007 | 870         |
| Session 5      |                               |       |                                 |       |                                 |         |                                 |          |             |
|                | $^{51}\text{V}/^{50}\text{V}$ | stdev | $^{56}\text{Fe}/^{54}\text{Fe}$ | stdev | $^{57}\text{Fe}/^{54}\text{Fe}$ | stdev   | $^{57}\text{Fe}/^{56}\text{Fe}$ | stdev    | RF power, W |
| measurement 1  | 409.56                        | 0.46  | 16.519                          | 0.003 | 0.39083                         | 0.00013 | 0.023659                        | 0.000005 | 1100        |
| measurement 2  | 409.69                        | 0.45  | 16.521                          | 0.002 | 0.39089                         | 0.00008 | 0.023659                        | 0.000004 | 1080        |
| measurement 3  | 409.92                        | 0.48  | 16.524                          | 0.002 | 0.39096                         | 0.00011 | 0.023661                        | 0.000006 | 1060        |
| measurement 4  | 410.02                        | 0.38  | 16.521                          | 0.002 | 0.39088                         | 0.00007 | 0.023660                        | 0.000004 | 1040        |
| measurement 5  | 410.27                        | 0.40  | 16.539                          | 0.002 | 0.39143                         | 0.00009 | 0.023668                        | 0.000006 | 1020        |
| measurement 6  | 410.14                        | 0.55  | 16.542                          | 0.003 | 0.39154                         | 0.00011 | 0.023670                        | 0.000005 | 1000        |
| measurement 7  | 410.35                        | 0.57  | 16.534                          | 0.002 | 0.39133                         | 0.00008 | 0.023669                        | 0.000006 | 980         |
| measurement 8  | 410.29                        | 0.46  | 16.523                          | 0.002 | 0.39091                         | 0.00012 | 0.023659                        | 0.000006 | 960         |
| measurement 9  | 410.28                        | 0.31  | 16.521                          | 0.002 | 0.39086                         | 0.00010 | 0.023658                        | 0.000005 | 940         |
| measurement 10 | 410.55                        | 0.24  | 16.536                          | 0.002 | 0.39137                         | 0.00013 | 0.023667                        | 0.000006 | 920         |
| measurement 11 | 410.23                        | 0.51  | 16.529                          | 0.002 | 0.39116                         | 0.00010 | 0.023665                        | 0.000005 | 900         |
| measurement 12 | 410.45                        | 0.44  | 16.543                          | 0.001 | 0.39164                         | 0.00012 | 0.023675                        | 0.000007 | 890         |
| measurement 13 | 410.39                        | 0.38  | 16.548                          | 0.002 | 0.39183                         | 0.00012 | 0.023679                        | 0.000006 | 880         |
| measurement 14 | 410.67                        | 0.39  | 16.555                          | 0.001 | 0.39207                         | 0.00009 | 0.023683                        | 0.000005 | 870         |
| measurement 15 | 410.31                        | 0.50  | 16.552                          | 0.002 | 0.39195                         | 0.00011 | 0.023681                        | 0.000005 | 860         |
| Session 6      |                               |       |                                 |       |                                 |         |                                 |          |             |
|                | $^{51}\text{V}/^{50}\text{V}$ | stdev | $^{56}\text{Fe}/^{54}\text{Fe}$ | stdev | $^{57}\text{Fe}/^{54}\text{Fe}$ | stdev   | $^{57}\text{Fe}/^{56}\text{Fe}$ | stdev    | RF power, W |
| measurement 1  | 405.62                        | 0.19  | 16.451                          | 0.003 | 0.38848                         | 0.00011 | 0.023615                        | 0.000004 | 1060        |
| measurement 2  | 406.40                        | 0.19  | 16.528                          | 0.001 | 0.39126                         | 0.00005 | 0.023673                        | 0.000003 | 1040        |
| measurement 3  | 406.43                        | 0.17  | 16.527                          | 0.001 | 0.39119                         | 0.00004 | 0.023671                        | 0.000002 | 1020        |
| measurement 4  | 406.41                        | 0.18  | 16.525                          | 0.001 | 0.39112                         | 0.00005 | 0.023668                        | 0.000003 | 1000        |
| measurement 5  | 406.49                        | 0.19  | 16.531                          | 0.002 | 0.39134                         | 0.00005 | 0.023673                        | 0.000003 | 980         |
| measurement 6  | 406.63                        | 0.21  | 16.531                          | 0.002 | 0.39135                         | 0.00005 | 0.023674                        | 0.000004 | 960         |
| measurement 7  | 406.59                        | 0.20  | 16.528                          | 0.001 | 0.39121                         | 0.00008 | 0.023670                        | 0.000004 | 940         |
| measurement 8  | 406.72                        | 0.18  | 16.531                          | 0.002 | 0.39133                         | 0.00007 | 0.023672                        | 0.000003 | 920         |
| measurement 9  | 406.78                        | 0.13  | 16.538                          | 0.001 | 0.39155                         | 0.00007 | 0.023676                        | 0.000004 | 900         |
| measurement 10 | 406.89                        | 0.19  | 16.546                          | 0.001 | 0.39184                         | 0.00005 | 0.023682                        | 0.000003 | 890         |

|                |                               |       |                                 |       |                                 |         |                                 |          |             |
|----------------|-------------------------------|-------|---------------------------------|-------|---------------------------------|---------|---------------------------------|----------|-------------|
| measurement 11 | 406.80                        | 0.12  | 16.546                          | 0.001 | 0.39185                         | 0.00006 | 0.023682                        | 0.000003 | 880         |
| Session 7      |                               |       |                                 |       |                                 |         |                                 |          |             |
|                | $^{51}\text{V}/^{50}\text{V}$ | stdev | $^{56}\text{Fe}/^{54}\text{Fe}$ | stdev | $^{57}\text{Fe}/^{54}\text{Fe}$ | stdev   | $^{57}\text{Fe}/^{56}\text{Fe}$ | stdev    | RF power, W |
| measurement 1  | 406.33                        | 0.18  | 16.509                          | 0.004 | 0.39067                         | 0.00016 | 0.023663                        | 0.000005 | 870         |
| measurement 2  | 406.78                        | 0.11  | 16.544                          | 0.002 | 0.39183                         | 0.00008 | 0.023684                        | 0.000003 | 880         |
| measurement 3  | 406.83                        | 0.18  | 16.547                          | 0.001 | 0.39190                         | 0.00007 | 0.023684                        | 0.000003 | 890         |
| measurement 4  | 406.76                        | 0.15  | 16.540                          | 0.001 | 0.39164                         | 0.00004 | 0.023679                        | 0.000004 | 900         |
| measurement 5  | 406.72                        | 0.22  | 16.543                          | 0.002 | 0.39173                         | 0.00006 | 0.023680                        | 0.000003 | 920         |
| measurement 6  | 406.74                        | 0.16  | 16.539                          | 0.002 | 0.39160                         | 0.00005 | 0.023677                        | 0.000002 | 940         |
| measurement 7  | 406.64                        | 0.14  | 16.541                          | 0.001 | 0.39167                         | 0.00004 | 0.023679                        | 0.000003 | 960         |
| measurement 8  | 406.53                        | 0.18  | 16.530                          | 0.002 | 0.39123                         | 0.00008 | 0.023669                        | 0.000003 | 980         |
| measurement 9  | 406.65                        | 0.16  | 16.533                          | 0.001 | 0.39142                         | 0.00007 | 0.023674                        | 0.000004 | 1000        |
| measurement 10 | 406.55                        | 0.21  | 16.534                          | 0.001 | 0.39144                         | 0.00005 | 0.023675                        | 0.000003 | 1020        |
| measurement 11 | 406.43                        | 0.13  | 16.525                          | 0.001 | 0.39112                         | 0.00005 | 0.023668                        | 0.000003 | 1040        |
| measurement 12 | 406.44                        | 0.30  | 16.533                          | 0.002 | 0.39141                         | 0.00006 | 0.023674                        | 0.000004 | 1060        |
| measurement 13 | 406.29                        | 0.23  | 16.520                          | 0.002 | 0.39092                         | 0.00007 | 0.023664                        | 0.000003 | 1080        |
| measurement 14 | 406.32                        | 0.18  | 16.527                          | 0.002 | 0.39118                         | 0.00008 | 0.023669                        | 0.000003 | 1100        |
| Session 8      |                               |       |                                 |       |                                 |         |                                 |          |             |
|                | $^{51}\text{V}/^{50}\text{V}$ | stdev | $^{56}\text{Fe}/^{54}\text{Fe}$ | stdev | $^{57}\text{Fe}/^{54}\text{Fe}$ | stdev   | $^{57}\text{Fe}/^{56}\text{Fe}$ | stdev    | RF power, W |
| measurement 1  | 409.17                        | 0.20  | 16.550                          | 0.002 | 0.39201                         | 0.00008 | 0.023687                        | 0.000004 | 870         |
| measurement 2  | 409.04                        | 0.16  | 16.553                          | 0.001 | 0.39211                         | 0.00008 | 0.023688                        | 0.000005 | 880         |
| measurement 3  | 409.08                        | 0.13  | 16.544                          | 0.001 | 0.39176                         | 0.00007 | 0.023680                        | 0.000003 | 890         |
| measurement 4  | 409.03                        | 0.18  | 16.548                          | 0.001 | 0.39195                         | 0.00007 | 0.023685                        | 0.000004 | 900         |
| measurement 5  | 409.01                        | 0.24  | 16.546                          | 0.002 | 0.39185                         | 0.00005 | 0.023682                        | 0.000002 | 920         |
| measurement 6  | 408.84                        | 0.17  | 16.533                          | 0.001 | 0.39143                         | 0.00007 | 0.023676                        | 0.000004 | 960         |
| measurement 7  | 408.75                        | 0.09  | 16.527                          | 0.001 | 0.39125                         | 0.00007 | 0.023673                        | 0.000004 | 1000        |
| measurement 8  | 408.53                        | 0.22  | 16.528                          | 0.001 | 0.39118                         | 0.00006 | 0.023668                        | 0.000005 | 1060        |
| measurement 9  | 408.66                        | 0.20  | 16.536                          | 0.001 | 0.39158                         | 0.00004 | 0.023680                        | 0.000003 | 1100        |
| Session 9      |                               |       |                                 |       |                                 |         |                                 |          |             |
|                | $^{51}\text{V}/^{50}\text{V}$ | stdev | $^{56}\text{Fe}/^{54}\text{Fe}$ | stdev | $^{57}\text{Fe}/^{54}\text{Fe}$ | stdev   | $^{57}\text{Fe}/^{56}\text{Fe}$ | stdev    | RF power, W |

|                |                               |       |                                 |       |                                 |         |                                 |          |             |
|----------------|-------------------------------|-------|---------------------------------|-------|---------------------------------|---------|---------------------------------|----------|-------------|
| measurement 1  | 408.59                        | 0.29  | 16.535                          | 0.002 | 0.39153                         | 0.00006 | 0.023678                        | 0.000004 | 1100        |
| measurement 2  | 408.63                        | 0.12  | 16.530                          | 0.002 | 0.39126                         | 0.00008 | 0.023670                        | 0.000003 | 1080        |
| measurement 3  | 408.72                        | 0.22  | 16.527                          | 0.001 | 0.39123                         | 0.00005 | 0.023672                        | 0.000005 | 1040        |
| measurement 4  | 408.70                        | 0.16  | 16.530                          | 0.002 | 0.39129                         | 0.00007 | 0.023672                        | 0.000004 | 1000        |
| measurement 5  | 408.68                        | 0.21  | 16.526                          | 0.002 | 0.39119                         | 0.00010 | 0.023672                        | 0.000004 | 960         |
| measurement 6  | 408.88                        | 0.24  | 16.540                          | 0.003 | 0.39167                         | 0.00011 | 0.023680                        | 0.000004 | 920         |
| measurement 7  | 409.26                        | 0.18  | 16.550                          | 0.001 | 0.39190                         | 0.00008 | 0.023680                        | 0.000004 | 900         |
| measurement 8  | 409.45                        | 0.21  | 16.553                          | 0.002 | 0.39206                         | 0.00009 | 0.023685                        | 0.000004 | 890         |
| measurement 9  | 409.19                        | 0.20  | 16.533                          | 0.001 | 0.39137                         | 0.00004 | 0.023671                        | 0.000003 | 880         |
| measurement 10 | 409.32                        | 0.20  | 16.556                          | 0.001 | 0.39218                         | 0.00005 | 0.023688                        | 0.000004 | 870         |
| Session 10     |                               |       |                                 |       |                                 |         |                                 |          |             |
|                | $^{51}\text{V}/^{50}\text{V}$ | stdev | $^{56}\text{Fe}/^{54}\text{Fe}$ | stdev | $^{57}\text{Fe}/^{54}\text{Fe}$ | stdev   | $^{57}\text{Fe}/^{56}\text{Fe}$ | stdev    | RF power, W |
| measurement 1  | 407.16                        | 0.11  | 16.943                          | 0.045 | 0.39410                         | 0.00007 | 0.023261                        | 0.000065 | 1150        |
| measurement 2  | 407.12                        | 0.07  | 16.626                          | 0.003 | 0.39349                         | 0.00002 | 0.023667                        | 0.000003 | 1170        |
| measurement 3  | 407.17                        | 0.08  | 16.640                          | 0.012 | 0.39347                         | 0.00003 | 0.023646                        | 0.000016 | 1200        |
| measurement 4  | 407.11                        | 0.06  | 16.637                          | 0.001 | 0.39361                         | 0.00005 | 0.023659                        | 0.000003 | 1220        |
| measurement 5  | 407.13                        | 0.09  | 16.633                          | 0.001 | 0.39370                         | 0.00002 | 0.023670                        | 0.000002 | 1250        |
| Session 11     |                               |       |                                 |       |                                 |         |                                 |          |             |
|                | $^{51}\text{V}/^{50}\text{V}$ | stdev | $^{56}\text{Fe}/^{54}\text{Fe}$ | stdev | $^{57}\text{Fe}/^{54}\text{Fe}$ | stdev   | $^{57}\text{Fe}/^{56}\text{Fe}$ | stdev    | RF power, W |
| measurement 1  | 408.89                        | 0.21  | 16.654                          | 0.008 | 0.39502                         | 0.00010 | 0.023719                        | 0.000003 | 1120        |
| measurement 2  | 408.69                        | 0.20  | 16.678                          | 0.003 | 0.39597                         | 0.00006 | 0.023742                        | 0.000002 | 1090        |
| measurement 3  | 408.04                        | 0.22  | 16.677                          | 0.005 | 0.39690                         | 0.00018 | 0.023798                        | 0.000004 | 1050        |
| measurement 4  | 409.26                        | 0.15  | 16.666                          | 0.008 | 0.39498                         | 0.00010 | 0.023700                        | 0.000006 | 1150        |
| Session 12     |                               |       |                                 |       |                                 |         |                                 |          |             |
|                | $^{51}\text{V}/^{50}\text{V}$ | stdev | $^{56}\text{Fe}/^{54}\text{Fe}$ | stdev | $^{57}\text{Fe}/^{54}\text{Fe}$ | stdev   | $^{57}\text{Fe}/^{56}\text{Fe}$ | stdev    | RF power, W |
| measurement 1  | 409.61                        | 0.13  | 16.653                          | 0.002 | 0.39508                         | 0.00010 | 0.023724                        | 0.000004 | 1150        |
| measurement 2  | 409.86                        | 0.12  | 16.637                          | 0.003 | 0.39460                         | 0.00013 | 0.023718                        | 0.000005 | 1170        |
| measurement 3  | 409.73                        | 0.12  | 16.639                          | 0.003 | 0.39428                         | 0.00002 | 0.023696                        | 0.000008 | 1200        |
| measurement 4  | 409.58                        | 0.18  | 16.683                          | 0.010 | 0.39537                         | 0.00013 | 0.023699                        | 0.000008 | 1230        |

Table S2. Isotope abundances of vanadium determined in previous studies and current IUPAC best measurement for vanadium isotopic composition and accepted standard atomic weight. Uncertainties in parentheses are expanded uncertainties.

| <i>E</i> | <i>A</i> | Observed interval of isotope-abundance variation in natural materials (isotope-amount fraction, <i>x</i> )* | Best measurement of isotope abundances from a single terrestrial source (isotope-amount fraction, <i>x</i> )** | Standard atomic weight currently accepted by IUPAC, $A_r(V)$ *** |
|----------|----------|-------------------------------------------------------------------------------------------------------------|----------------------------------------------------------------------------------------------------------------|------------------------------------------------------------------|
| Vanadium | 50       | 0.002487 – 0.002502                                                                                         | 0.002497(6)                                                                                                    | 50.9415(1)                                                       |
|          | 51       | 0.997498 – 0.997513                                                                                         | 0.997503(6)                                                                                                    |                                                                  |

\* For details see Meija et al. *Pure Appl. Chem.* 2016; 88(3): 293–306.

\*\* For details see <https://ciaaw.org/best-measurements.htm> and Flesch et al. *Advanced Mass Spectrometry* III, pp. 571, Leiden, London (1966). In the work by Flesch et al. (1966), vanadium isotope ratios were determined by gas source mass spectrometry using vanadium oxytrifluoride, VOF<sub>3</sub>, to introduce vanadium into a gas source. Dual collector mass spectrometer was used (Consolidate Electro Dynamics Corporation, Model 21-220, Pasadena, USA). Sample preparation and data treatment were detailed in this paper. The authors reported relative standard deviation of <sup>51</sup>V/<sup>50</sup>V isotope ratios of individual samples they measured as ranging from 0.02% to 0.10%.

\*\*\* For details see <https://ciaaw.org/atomic-weights.htm>, Prohaska et al., *Pure Appl. Chem.* 2022; 94(5), 573–600, and Holden et al., *Pure Appl. Chem.* 1979, 51, 405–433.

Additional details of the measurement procedure in this study

- Iron was selected as the calibrant for vanadium isotope ratios because Fe and V are the closest elements by mass that do not have isobaric interferences from each other. Both elements have to be measured in high mass resolution mode. Also, both iron and vanadium are transition metals from the same row of the Periodic Table.
- Self-aspiration through the stable introduction system consisting of tandem quartz spray chamber (cyclone + Scott double pass) was used for sample introduction into the plasma. Concentration of vanadium at 2 mg/l was found most comfortable for the measurements, giving stable signal intensity and avoiding the risk of nebuliser clogging. A desolvating nebuliser was not used in the measurements as not sufficiently tested way of sample introduction, to avoid potential vanadium isotope fractionation during heating of sample aerosol during desolvation (temperature range of 110°C-140°C). It is known that vanadium pentoxide, V<sub>2</sub>O<sub>5</sub>, the predominant chemical form of the element in aerated acidic solution, exhibits vapor pressure that increases non-linearly from being negligible at room temperature to the melting point of the compound at 690°C. Previous studies also pointed out that the main pathway of V<sub>2</sub>O<sub>5</sub> volatilisation at temperatures higher than 100°C is by the formation of volatile hydroxyl compounds with water, and not by an increase of temperature only (*J. Phys. Chem.*, 1968, 72(9):3293-3296, <https://doi.org/10.1021/j100855a035>; *E3S Web of Conferences*, 2021, 268, 01005, <https://doi.org/10.1051/e3sconf/202126801005> ).

- In line with practice of the regression model, measurements involved a series of single measurements with incremental changes in the RF power (see section Mass spectrometry in the main text). Different patterns of the RF power changes from the maximum sensitivity setting at ~1100W were used as detailed in the Table S1. This also allowed testing ruggedness of the measurement method.
- Combined standard uncertainties for the measurement results were obtained in accordance with the JCGM “Guide to the Expression of Uncertainty in Measurement” ([https://www.bipm.org/documents/20126/2071204/JCGM\\_100\\_2008\\_E.pdf](https://www.bipm.org/documents/20126/2071204/JCGM_100_2008_E.pdf)). Combined standard uncertainties of  $n(^{51}\text{V})/n(^{50}\text{V})$  values were calculated by propagating standard uncertainties of input variables with the aid of Kragten's numerical method of differentiation using a spreadsheet template made in the MS Excel program. The calculation template with explanatory notes can be found in the Electronic Supplementary Information our previous work (*J. Anal. At. Spectrom.*, 2020, 35, 2723; <https://doi.org/10.1039/D0JA00145G>).
